# Supplementary material
Source: PubMed Central journal article supplement (PMC5786796)
Supplement: AAC.02106-17_zac002186890s1.pdf [file AAC.02106-17_zac002186890s1.pdf]

FIG S1. Location of *mcr-3.10* on chromosome of *Aeromonas caviae* 17AC and *Proteus mirabilis* 17PM, and on plasmid of *Escherichia coli* 17EC. (A) S1-PFGE and (B) the corresponding Southern hybridization using the *mcr-3.10* probe. Lane M, marker H9812; Lane 1, *A. caviae* 17AC; Lane 2, *P. mirabilis* 17PM; Lane 3, *E. coli* 17EC; Lane 4, transconjugant T-17EC; Lane 5, *E. coli* J53.

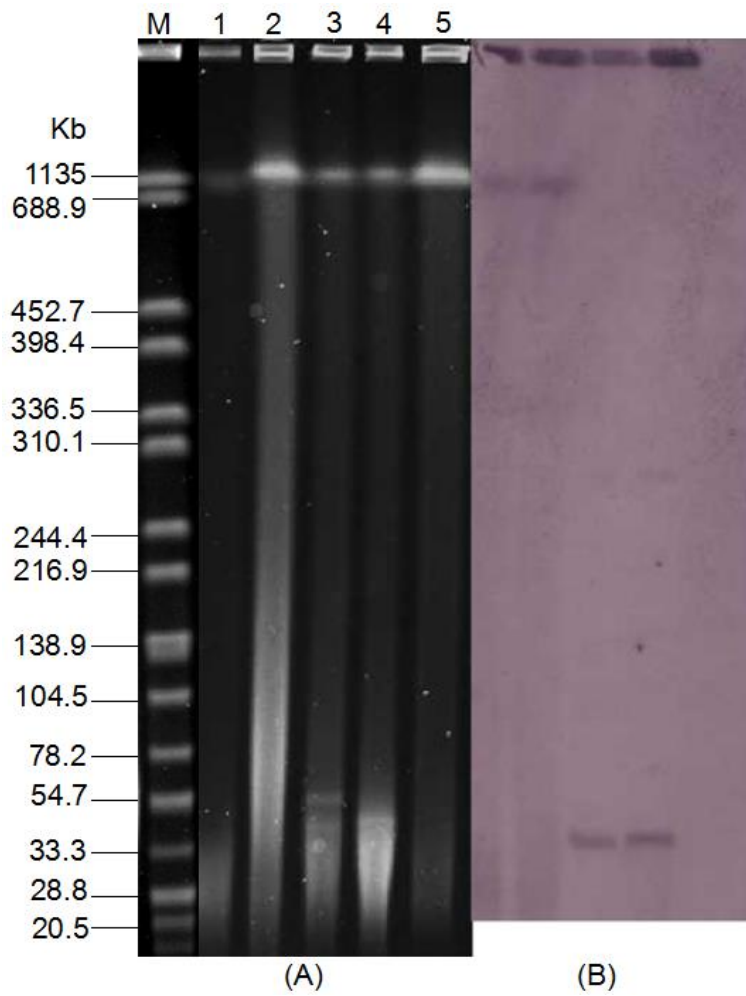

Table S1. MIC values (mg/liter) for the parental, transconjugant T-17EC, and control strains

|     | <i>A. caviae</i><br>17AC | <i>P. mirabilis</i><br>17PM | <i>E. coli</i><br>17EC | T-17EC   | J53   | ATCC<br>25922 |
|-----|--------------------------|-----------------------------|------------------------|----------|-------|---------------|
| COL | <b>32</b>                | <b>32</b>                   | <b>8</b>               | <b>4</b> | 0.25  | 1             |
| POL | <b>32</b>                | <b>16</b>                   | <b>8</b>               | <b>4</b> | 0.25  | 1             |
| AMC | <b>32/16</b>             | <b>64/32</b>                | 2/1                    | 4/2      | 4/2   | 2/1           |
| CEF | <b>128</b>               | <b>16</b>                   | 0.125                  | 0.125    | 0.125 | 0.125         |
| IMI | <0.125                   | 0.125                       | <0.125                 | 0.25     | 0.25  | 0.0625        |
| MER | 0.0625                   | 0.0625                      | 0.0625                 | 0.063    | 0.063 | 0.031         |
| AZT | <b>2</b>                 | <b>2</b>                    | <0.125                 | <0.125   | <0.25 | 0.125         |
| RIF | <b>128</b>               | 16                          | <b>128</b>             | 8        | 4     | 8             |
| GEN | <b>256</b>               | <b>512</b>                  | <b>16</b>              | <b>2</b> | 1     | 0.25          |
| CHL | <b>256</b>               | <b>512</b>                  | <b>128</b>             | 4        | 2     | 4             |
| CIP | <b>128</b>               | <b>64</b>                   | <b>32</b>              | 0.012    | 0.008 | 0.012         |
| TET | <b>16</b>                | <b>128</b>                  | <b>16</b>              | <b>8</b> | 0.5   | 1             |
| TIG | <b>2</b>                 | <b>8</b>                    | 0.125                  | 0.125    | 0.063 | 0.125         |

Note: CST, colistin; PB, polymyxin B; AMC, amoxicillin-clavulanate; CEF, cefotaxime; IMP, imipenem; MER, meropenem; AZT, aztreonam; RIF, rifampicin; GEN, gentamicin; CHL, chloramphenicol; CIP, ciprofloxacin; TET, tetracycline; TIG, tigecycline. The bold numbers mean the isolates are resistant to the tested antimicrobial agents.
